# Supplementary material for: Photocatalytic Degradation of Palm Oil Mill Effluent (POME) Waste Using BiVO4 Based Catalysts
Source: MDPI journal article supplement (doi:10.3390/molecules26206225), 2021-10-15
Supplement: s1 [file s1]

---

## SUPPLEMENTARY INFORMATION

# Photocatalytic Degradation of Palm Oil Mill Effluent (POME) Waste Using BiVO<sub>4</sub> Based Catalysts

Wibawa Hendra Saputera<sup>1,2,3,\*</sup>, Aryan Fathoni Amri<sup>1</sup>, Rino R. Mukti<sup>2,4,5</sup>, Veinardi Suendo<sup>4,5</sup>, Hary Devianto<sup>1,3</sup>, Dwiwahju Sasongko<sup>1,3</sup>

<sup>1</sup> Research Group on Energy and Chemical Engineering Processing System, Department of Chemical Engineering, Faculty of Industrial Technology, Institut Teknologi Bandung, Jl. Ganesha no. 10, Bandung 40132, Indonesia; aryanfathoni@gmail.com (A.F.A.); hardev@che.itb.ac.id (H.D.) sasongko@che.itb.ac.id (D.S.)

<sup>2</sup> Center for Catalysis and Reaction Engineering, Institut Teknologi Bandung, Jl. Ganesha no. 10, Bandung 40132, Indonesia

<sup>3</sup> Research Center for New and Renewable Energy, Institut Teknologi Bandung, Jl. Ganesha no. 10, Bandung 40132, Indonesia

<sup>4</sup> Division of Inorganic and Physical Chemistry, Faculty of Mathematics and Natural Sciences, Institut Teknologi Bandung, Jl. Ganesha no. 10, Bandung 40132, Indonesia; rino@chem.itb.ac.id (R.R.M.); vsuendo@chem.itb.ac.id (V.S.)

<sup>5</sup> Research Center for Nanoscience and Nanotechnology, Institut Teknologi Bandung, Jl. Ganesha no. 10, Bandung 40132, Indonesia

\* Correspondence: hendra@che.itb.ac.id (W.H.S); Tel.: +62-821-1768-6235

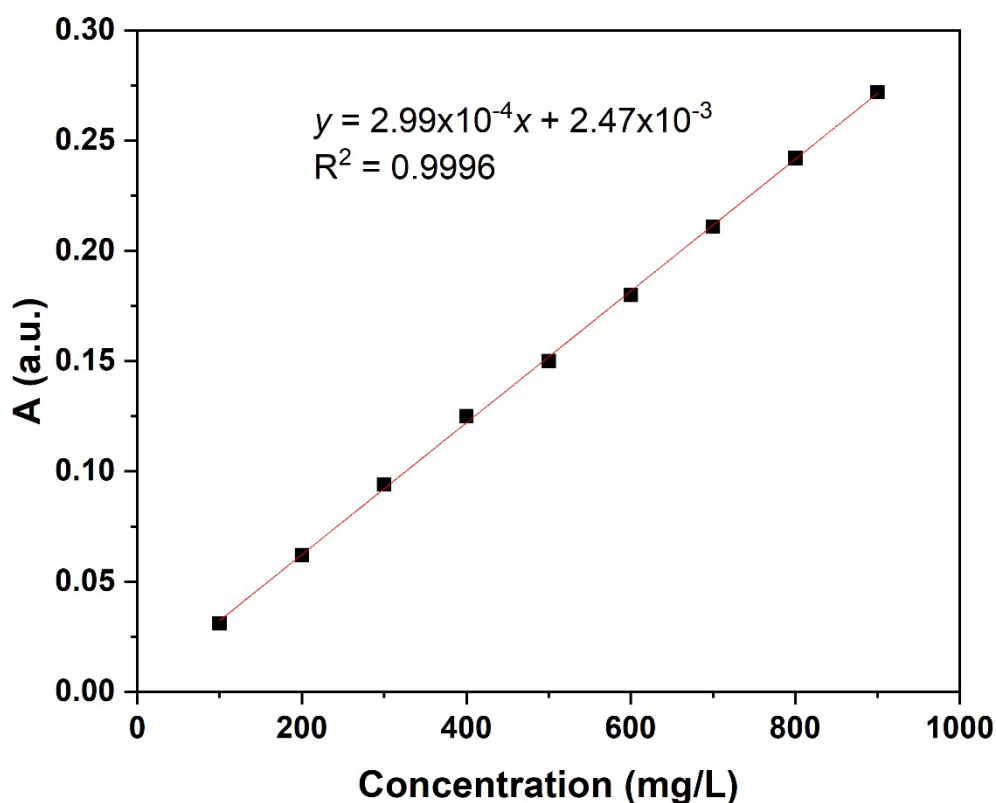

Figure S1. Calibration curve of standard COD solution.

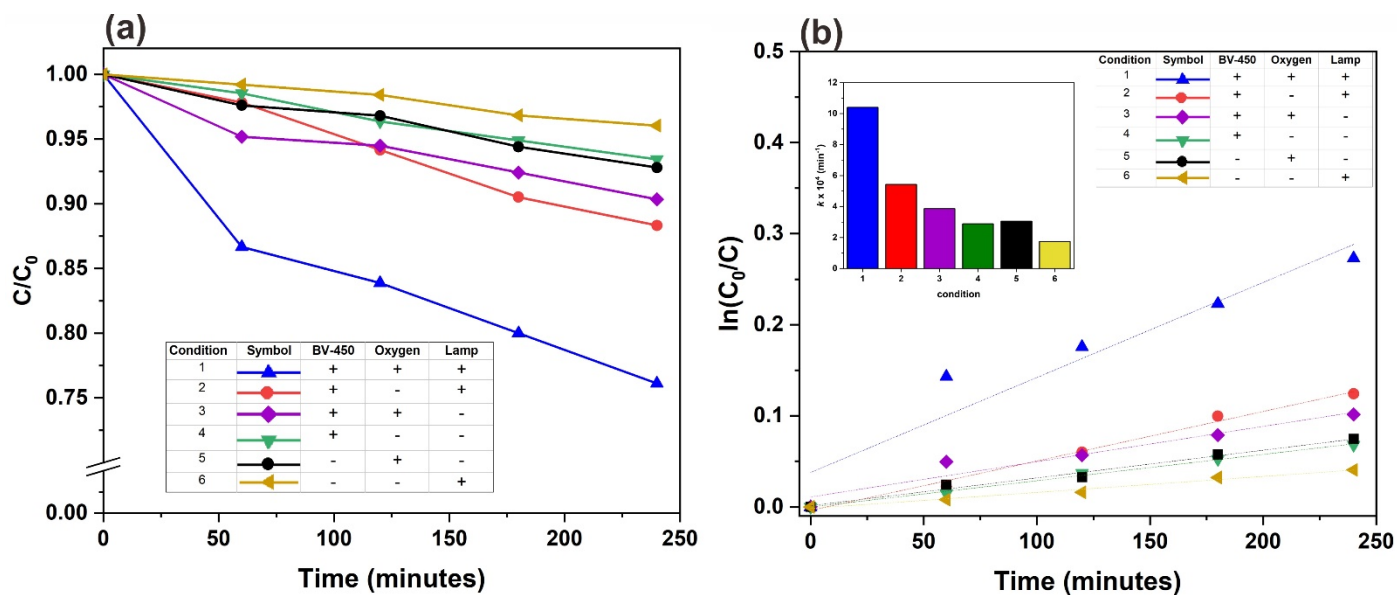

**Figure S2.** (a) Photocatalytic degradation of POME (b) Pseudo-first-order linear plots of  $\ln(C_0/C)$  versus irradiation time for the degradation kinetics of POME using BV-450 with varying operating conditions consisting the presence of BV-450 catalyst, oxygen purging, and irradiation with Xenon lamp. Inset of (b): the apparent first-order rate constant ( $k$ ) of BV-450 catalyst with different operating conditions.

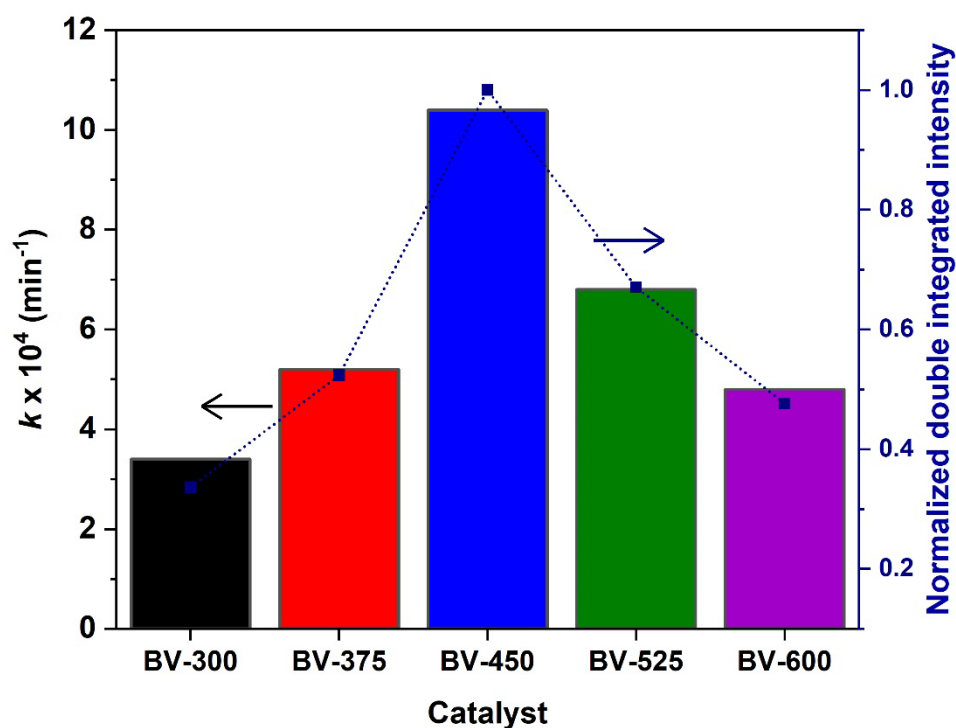

Figure S3. Relationship between apparent first order rate constant ( $k$ ) and normalized double integrated intensity of EPR spectra.

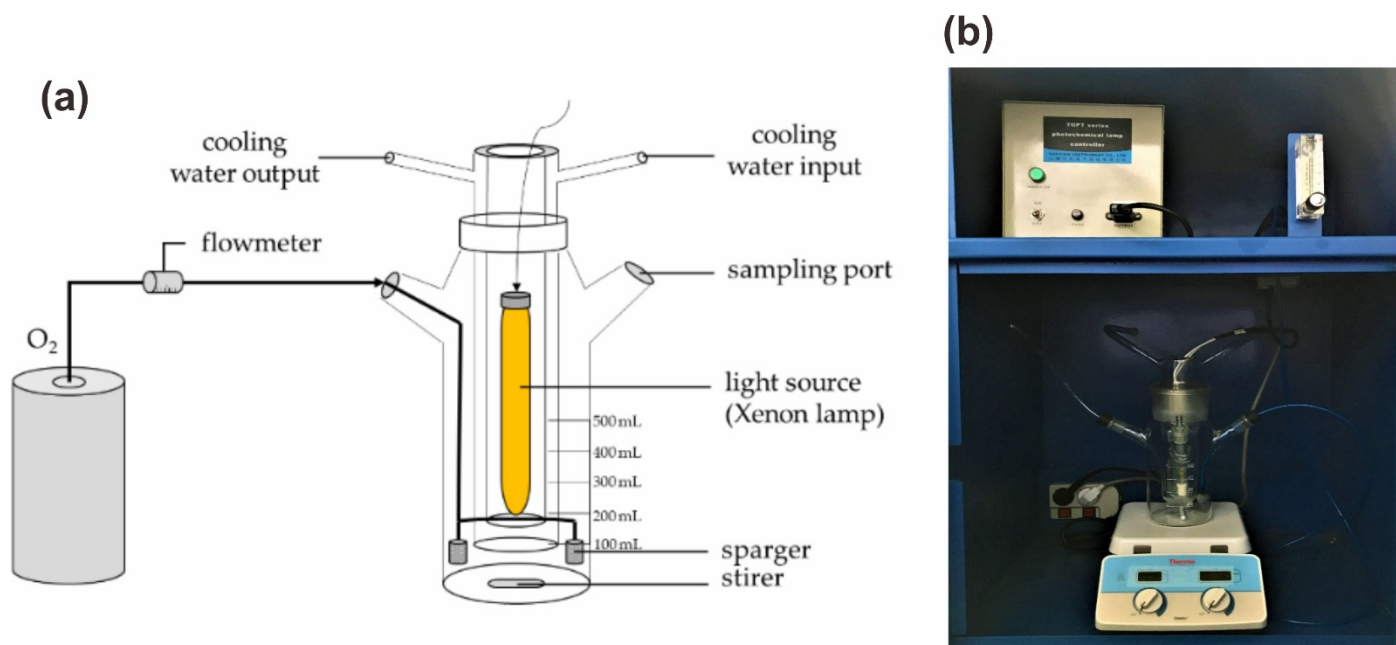

Figure S4. (a) Schematic representation diagram of photocatalytic reactor (b) Actual photocatalytic reactor setup.

**Table S1.** Photocatalytic performance for POME degradation using various metal oxide-based semiconductor photocatalysts

| Photocatalyst                    | Light Source               | Catalyst Loading | Photocatalytic performance                                              | Ref.      |
|----------------------------------|----------------------------|------------------|-------------------------------------------------------------------------|-----------|
| TiO <sub>2</sub>                 | UV Fluorescent tube (20 W) | 0.01 g/L         | COD removal: 97% (42 min)<br>k = n.a.                                   | [1]       |
| TiO <sub>2</sub>                 | UV lamp (100 W)            | 1.0 g/L          | COD removal: 52% (4 h)<br>k = 2.90 × 10 <sup>-3</sup> min <sup>-1</sup> | [2]       |
| TiO <sub>2</sub>                 | UV lamp (100 W)            | 1.04 g/L         | COD removal: 55% (4 h)<br>k = n.a.                                      | [3]       |
| TiO <sub>2</sub> anatase         | Solar light                | 0.1 g/L          | COD removal: 88% (5 h)<br>k = n.a.                                      | [4]       |
| ZnO                              | Mercury lamp (100 W)       | 1.0 g/L          | COD removal: 50% (4 h)<br>k = 3.12 × 10 <sup>-3</sup> min <sup>-1</sup> | [5]       |
| ZnO-PEG                          | UV lamp (15 W)             | 0.5 g/L          | COD removal: 94% (n.a.)<br>k = n.a.                                     | [6]       |
| CaFe <sub>2</sub> O <sub>4</sub> | Xenon lamp (500 W)         | 0.75 g/L         | COD removal: 69% (8 h)<br>k = 2.71 × 10 <sup>-3</sup> min <sup>-1</sup> | [7]       |
| BiVO <sub>4</sub>                | Xenon lamp (300 W)         | 1.0 g/L          | COD removal: 24% (4 h)<br>k = 1.04 × 10 <sup>-3</sup> min <sup>-1</sup> | This work |

**Table S2.** Photocatalytic performance of neat BiVO<sub>4</sub> photocatalyst for various pollutants degradation.

| Pollutant                     | Light Source                           | Photocatalyst properties                                                                                                                                        | Pollutant concentration /Catalyst Loading | Photocatalytic performance                                              | Ref.      |
|-------------------------------|----------------------------------------|-----------------------------------------------------------------------------------------------------------------------------------------------------------------|-------------------------------------------|-------------------------------------------------------------------------|-----------|
| Palm oil mill effluent (POME) | Xenon lamp (300 W)<br>λ: 200-800 nm    | UV-Vis: E <sub>g</sub> = 2.50 eV<br>S <sub>BET</sub> = 3.45 m <sup>2</sup> /g<br>EPR: V <sub>vacancy</sub> at g=1.978<br>SEM: small granules<br>XRD: Monoclinic | 200 ppm/<br>1.0 g/L                       | COD removal: 24% (4 h)<br>k = 1.04 × 10 <sup>-3</sup> min <sup>-1</sup> | This work |
| Methylene blue (MB)           | Tungsten halogen (400 W)<br>λ > 400 nm | UV-Vis: E <sub>g</sub> = 2.33 eV<br>S <sub>BET</sub> = 8.80 m <sup>2</sup> /g<br>SEM: nanoplate<br>XRD: Monoclinic                                              | 10 ppm/<br>1.0 g/L                        | MB removal: 98% (2 h)<br>k = 3.18 × 10 <sup>-2</sup> min <sup>-1</sup>  | [8]       |
| Methyl orange (MO)            | Xenon lamp (300 W)<br>λ > 400 nm       | UV-Vis: E <sub>g</sub> = 2.45 eV<br>S <sub>BET</sub> = 8.40 m <sup>2</sup> /g<br>SEM: porous spherical<br>XRD: Monoclinic                                       | 3.27 ppm/<br>0.5 g/L                      | MO removal: 84% (2 h)<br>k = n.a.                                       | [9]       |
| Rhodamine Blue (RhB)          | Xenon lamp (500 W)<br>λ > 400 nm       | UV-Vis: E <sub>g</sub> = 2.50 eV<br>SEM: ellipsoidal<br>XRD: Monoclinic                                                                                         | 10 ppm/<br>0.4 g/L                        | RhB removal: 50.5% (2.5 h)<br>k = n.a.                                  | [10]      |
| Carbamazepine (CBZ)           | Xenon lamp (300 W)<br>λ > 420 nm       | UV-Vis: E <sub>g</sub> = 2.32 eV<br>S <sub>BET</sub> = 1.04 m <sup>2</sup> /g<br>SEM: hexagonal/cubic<br>XRD: Monoclinic                                        | 10 ppm/<br>1.0 g/L                        | CBZ removal: 2% (2 h)<br>k = 1.20 × 10 <sup>-4</sup> min <sup>-1</sup>  | [11]      |

## References

1. Haji Alhaji, M.; Sanaullah, K.; Fong Lim, S.; Ragai Henry Rigit, A.; Hamza, A.; Khan, A. Modeling and optimization of photocatalytic treatment of pre-treated palm oil mill effluent (POME) in a UV/TiO<sub>2</sub> system using response surface methodology (RSM). *Cogent Engineering* **2017**, *4*, 1382980, doi:10.1080/23311916.2017.1382980.
2. Ng, K.H.; Cheng, C.K. A novel photomineralization of POME over UV-responsive TiO<sub>2</sub> photocatalyst: kinetics of POME degradation and gaseous product formations. *RSC Advances* **2015**, *5*, 53100–53110, doi:10.1039/C5RA06922J.
3. Ng, K.H.; Cheng, C.K. Photocatalytic degradation of palm oil mill effluent over ultraviolet-responsive titania: Successive assessments of significance factors and process optimization. *Journal of Cleaner Production* **2017**, *142*, 2073–2083, doi:<https://doi.org/10.1016/j.jclepro.2016.11.077>.
4. Kanakaraju, D., Liyana Binti Ahmad, N., Binti Mohd Sedik, N., Gan Hsien Long, S., Meng Guan, T., & Ying Chin, L. . Performance of Solar Photocatalysis and Photo-Fenton Degradation of Palm Oil Mill Effluent. *Malaysian Journal of Analytical Science* **2017**, *21*, 996–1007.
5. Ng, K.H.; Cheng, C.K. Photo-polishing of POME into CH<sub>4</sub>-lean biogas over the UV-responsive ZnO photocatalyst. *Chemical Engineering Journal* **2016**, *300*, 127–138, doi:<https://doi.org/10.1016/j.cej.2016.04.105>.
6. Zainuri, N.Z.; Hairom, N.H.H.; Sidik, D.A.B.; Desa, A.L.; Misdan, N.; Yusof, N.; Mohammad, A.W. Palm oil mill secondary effluent (POMSE) treatment via photocatalysis process in presence of ZnO-PEG nanoparticles. *Journal of Water Process Engineering* **2018**, *26*, 10–16, doi:<https://doi.org/10.1016/j.jwpe.2018.08.009>.
7. Charles, A.; Khan, M.R.; Ng, K.H.; Wu, T.Y.; Lim, J.W.; Wongsakulphasatch, S.; Witoon, T.; Cheng, C.K. Facile synthesis of CaFe<sub>2</sub>O<sub>4</sub> for visible light driven treatment of polluting palm oil mill effluent: Photokinetic and scavenging study. *Science of The Total Environment* **2019**, *661*, 522–530, doi:<https://doi.org/10.1016/j.scitotenv.2019.01.195>.
8. Xu, C.; Zhu, G.; Wu, J.; Liang, J. Template-Free Hydrothermal Synthesis Different Morphologies of Visible-Light-Driven BiVO<sub>4</sub> Photocatalysts. *Journal of Nanoscience and Nanotechnology* **2014**, *14*, 4475–4480, doi:10.1166/jnn.2014.8039.
9. Jiang, H.; Dai, H.; Meng, X.; Zhang, L.; Deng, J.; Liu, Y.; Au, C.T. Hydrothermal fabrication and visible-light-driven photocatalytic properties of bismuth vanadate with multiple morphologies and/or porous structures for Methyl Orange degradation. *Journal of Environmental Sciences* **2012**, *24*, 449–457, doi:[https://doi.org/10.1016/S1001-0742\(11\)60793-6](https://doi.org/10.1016/S1001-0742(11)60793-6).
10. Lei, B.-X.; Zeng, L.-L.; Zhang, P.; Sun, Z.-F.; Sun, W.; Zhang, X.-X. Hydrothermal synthesis and photocatalytic properties of visible-light induced BiVO<sub>4</sub> with different morphologies. *Advanced Powder Technology* **2014**, *25*, 946–951, doi:<https://doi.org/10.1016/j.appt.2014.01.014>.
11. Wang, B.; Li, P.; Du, C.; Wang, Y.; Gao, D.; Li, S.; Zhang, L.; Wen, F. Synergetic effect of dual co-catalysts on the activity of BiVO<sub>4</sub> for photocatalytic carbamazepine degradation. *RSC Advances* **2019**, *9*, 41977–41983, doi:10.1039/C9RA07152K.
